# Supplementary material
Source: PubMed Central journal article supplement (PMC4790793)
Supplement: farj010305.ww1_default.pdf [file farj010305.ww1_default.pdf]

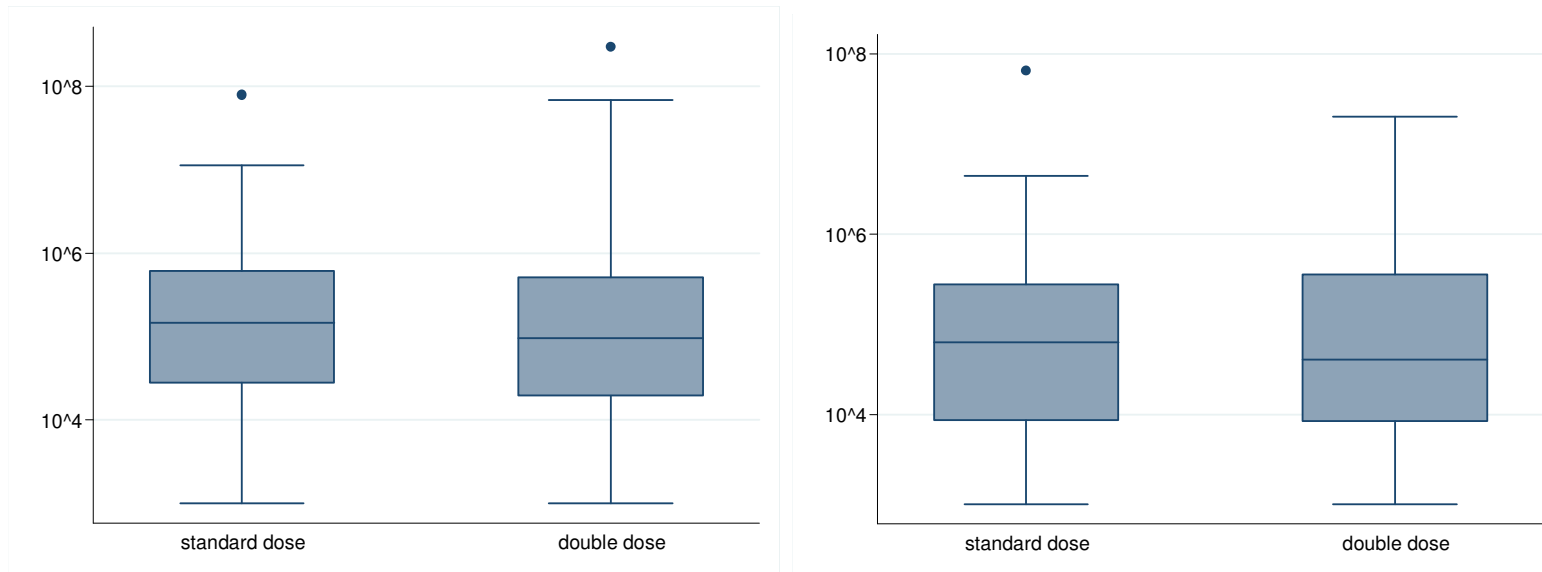

Appendix: Supplementary figure 1 {posted as supplied by author}

Box plot of viral distribution at baseline for nose (left panel) and throat swabs (right panels). Boxes indicate upper (Q3, top) and lower (Q1, bottom) quartile of distribution, line in the box indicates median, whiskers indicate observation nearest to upper or lower quartile  $\pm 3/2*(IQ$  range).
